# Supplementary material for: First synthesis and electronic properties of diphenothiazine dumbbells bridged by heterocycles
Source: Royal Society of Chemistry journal article supplement (doi:10.1039/b814850c), 2008-11-28

# Synthesis and electronic communication in diphenothiazine dumbbells bridged by heterocycles

Adam W. Franz,<sup>a</sup> Larisa N. Popa,<sup>a,b</sup> Frank Rominger,<sup>c,§</sup> and Thomas J. J.  
Müller<sup>a,\*</sup>

<sup>a</sup> *Institut für Organische Chemie und Makromolekulare Chemie, Heinrich-Heine-Universität  
Düsseldorf, Universitätsstr. 1, 40225 Düsseldorf, Germany. Fax: +4902118114324; E-mail:  
ThomasJJ.Mueller@uni-duesseldorf.de*

<sup>b</sup> *Babes-Bolyai University Cluj-Napoca, Faculty of Chemistry and Chemical Engineering, Arany  
Janos Str. no.11, Cluj-Napoca, 400428 Romania*

<sup>c</sup> *Organisch-chemisches Institut, Ruprecht-Karls-Universität Heidelberg, Im Neuenheimer Feld 270,  
D-69120 Heidelberg, Germany.*

<sup>§</sup> *X-ray structure analysis.*

## Electronic Supplementary Information (ESI)

|                                                                  |   |
|------------------------------------------------------------------|---|
| a) General experimental considerations                           | 2 |
| b) Cyclovoltammograms of <b>8-13</b>                             | 3 |
| Cyclovoltammogram of <b>8</b>                                    | 3 |
| Cyclovoltammogram of <b>9</b>                                    | 3 |
| Cyclovoltammogram of <b>10</b>                                   | 3 |
| Cyclovoltammogram of <b>11</b>                                   | 4 |
| Cyclovoltammogram of <b>12</b>                                   | 4 |
| Cyclovoltammogram of <b>13</b>                                   | 4 |
| c) <sup>1</sup> H and <sup>13</sup> C NMR spectra of <b>8-13</b> | 5 |
| <sup>1</sup> H NMR spectra of <b>8</b>                           | 5 |
| <sup>13</sup> C NMR spectra of <b>8</b>                          | 5 |
| DEPT NMR spectra of <b>8</b>                                     | 6 |
| <sup>1</sup> H NMR spectra of <b>9</b>                           | 6 |
| <sup>13</sup> C NMR spectra of <b>9</b>                          | 7 |
| DEPT NMR spectra of <b>9</b>                                     | 7 |
| <sup>1</sup> H NMR spectra of <b>10</b>                          | 8 |
| <sup>13</sup> C NMR spectra of <b>10</b>                         | 8 |
| DEPT NMR spectra of <b>10</b>                                    | 9 |

|                                                                  |    |
|------------------------------------------------------------------|----|
| <sup>1</sup> H NMR spectra of <b>11</b>                          | 9  |
| <sup>13</sup> C NMR spectra of <b>11</b>                         | 10 |
| DEPT NMR spectra of <b>11</b>                                    | 10 |
| <sup>1</sup> H NMR spectra of <b>12</b>                          | 11 |
| <sup>13</sup> C NMR spectra of <b>12</b>                         | 11 |
| DEPT NMR spectra of <b>12</b>                                    | 12 |
| <sup>1</sup> H NMR spectra of <b>13</b>                          | 12 |
| <sup>13</sup> C NMR spectra of <b>13</b>                         | 13 |
| DEPT NMR spectra of <b>13</b>                                    | 13 |
| d) Molecular modelling coordinates of <b>11</b> and <b>13</b>    | 14 |
| Molecular modelling coordinates (B3LYP/6-31+G(d,p)) of <b>11</b> | 14 |
| Molecular modelling coordinates (B3LYP/6-31+G(d,p)) of <b>13</b> | 16 |
| e) UV/Vis-NIR spectra of <b>9</b> and <b>9-H<sup>+</sup></b>     | 18 |

#### a) General considerations

Reagents, catalysts and ligands were purchased reagent grade and used without further purification. The used solvents were dried and distilled according to standard procedures. 2,5-Dibromofurane (**6**) and 9,9'-dihexyl-2,7-dibromofluorene (**2**) were prepared according to literature. Column chromatography: silica gel 60, mesh 70-230. TLC: silica gel plates. <sup>1</sup>H and <sup>13</sup>C NMR spectra: CD<sub>2</sub>Cl<sub>2</sub>, (locked to Me<sub>4</sub>Si). The assignments of quaternary C, CH, CH<sub>2</sub> and CH<sub>3</sub> have been made by using DEPT spectra. Elemental analyses were carried out in the Microanalytical Laboratories, Institut für Pharmazeutische Chemie, Heinrich-Heine University, Düsseldorf, Germany.

Fluorescence measurements (Perkin-Elmer LS-55) were performed in dry and degassed CH<sub>2</sub>Cl<sub>2</sub> at room temperature. To avoid re-absorption and re-emission effects the concentrations were strictly kept below 1 μM. The solutions were irradiated at approximately 10 nm less in energy than the longest wave length absorption maximum.

Electrochemistry: Cyclic voltammetry experiments (EG & G potentiostatic instrumentation) were performed under argon in dry and degassed CH<sub>2</sub>Cl<sub>2</sub> at room temperature and at scan rates of 100, 250, 500, and 1000 mVs<sup>-1</sup>. The electrolyte was Bu<sub>4</sub>NPF<sub>6</sub> (0.025 M). The working electrode was a 1 mm platinum disk, the counter-electrode was a platinum wire, and the reference electrode was a Ag/AgCl electrode. The potentials were corrected to the internal standard of Fc/Fc<sup>+</sup> in CH<sub>2</sub>Cl<sub>2</sub> ( $E_0^{0/+1} = 450$  mV).<sup>25</sup>

## b) Cyclovoltammograms of 8-13

Cyclovoltammogram of **8** in CH<sub>2</sub>Cl<sub>2</sub>

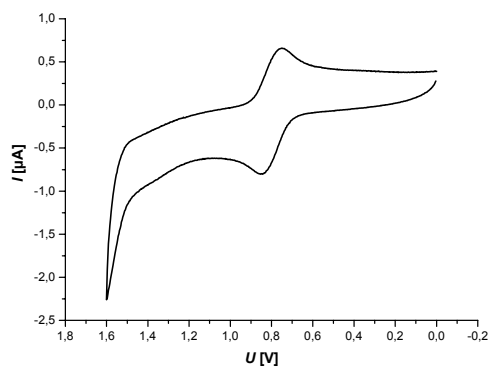

Cyclovoltammogram of **9** in CH<sub>2</sub>Cl<sub>2</sub>

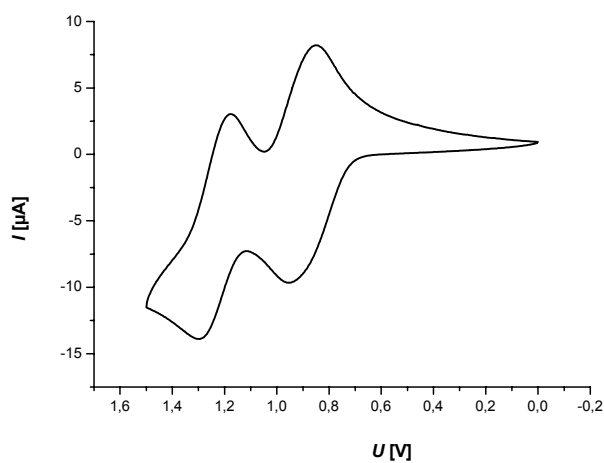

Cyclovoltammogram of **10** in CH<sub>2</sub>Cl<sub>2</sub>

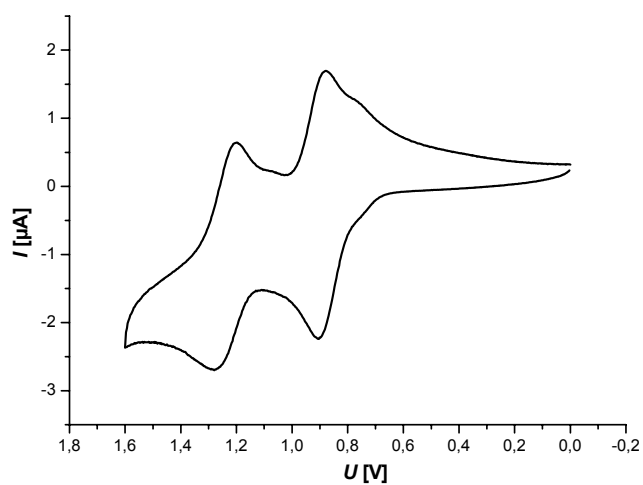

Cyclovoltammogram of **11** in CH<sub>2</sub>Cl<sub>2</sub>

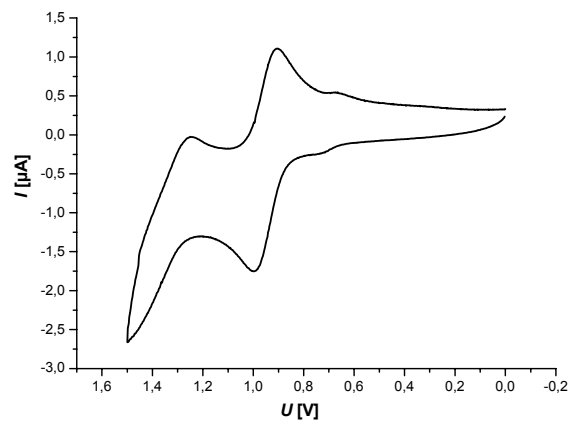

Cyclic voltammogram of **12** in CH<sub>2</sub>Cl<sub>2</sub>

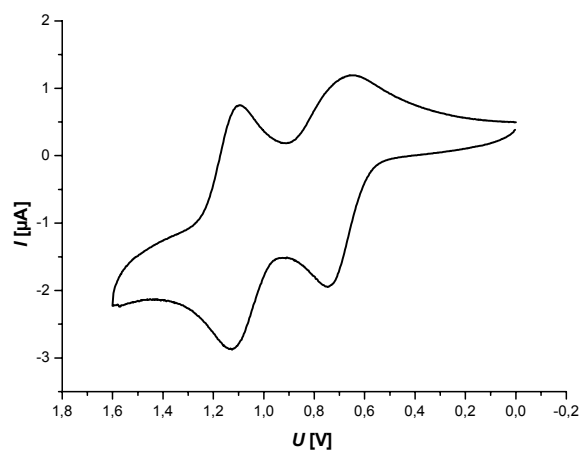

Cyclic voltammogram of **13** in CH<sub>2</sub>Cl<sub>2</sub>

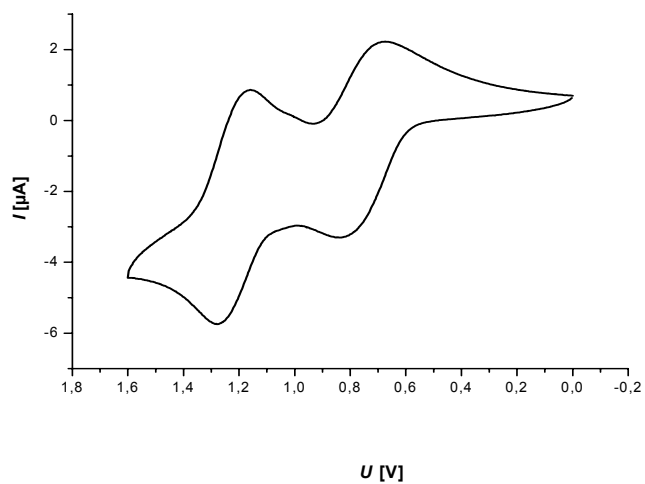

### c) $^1\text{H}$ and $^{13}\text{C}$ NMR spectra of **8-13**

$^1\text{H}$  NMR spectra of **8** recorded in  $\text{CD}_2\text{Cl}_2$  (298K, 500 MHz)

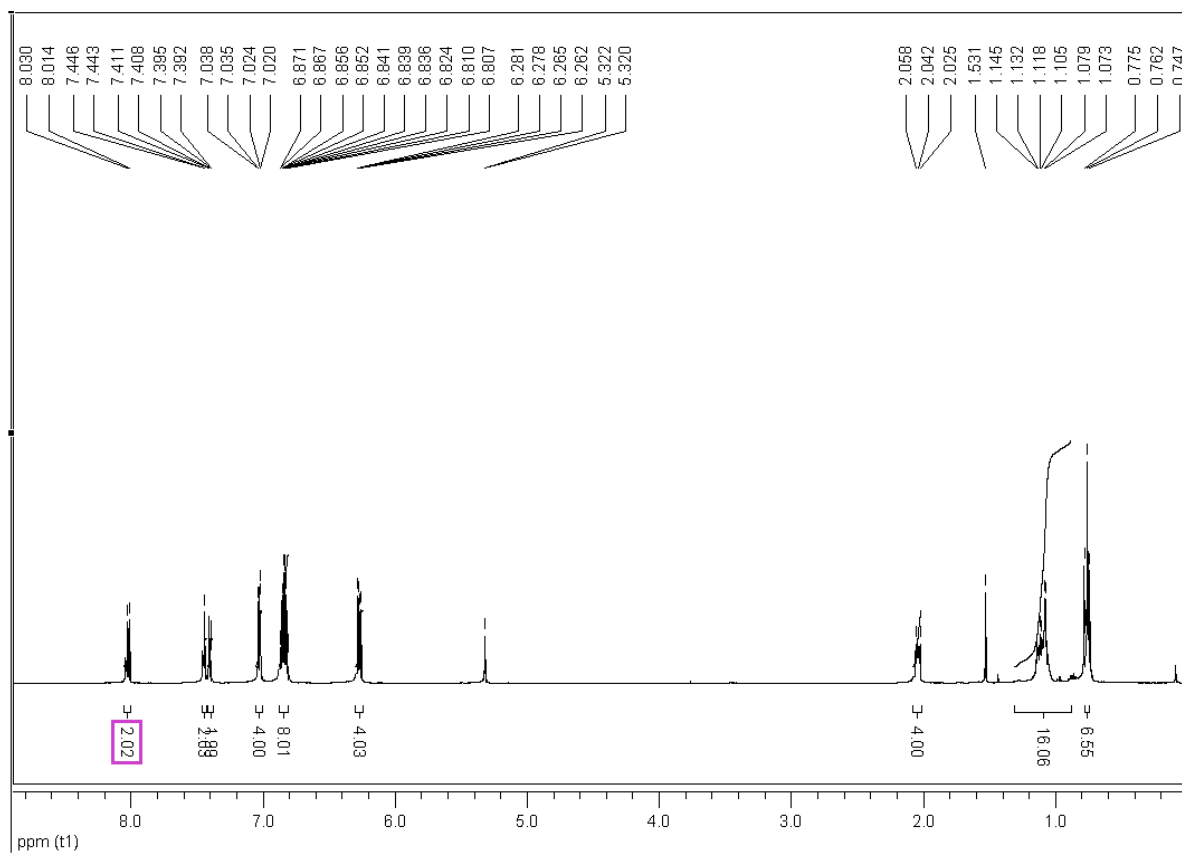

$^{13}\text{C}$  NMR spectra of **8** recorded in  $\text{CD}_2\text{Cl}_2$  (298K, 125 MHz)

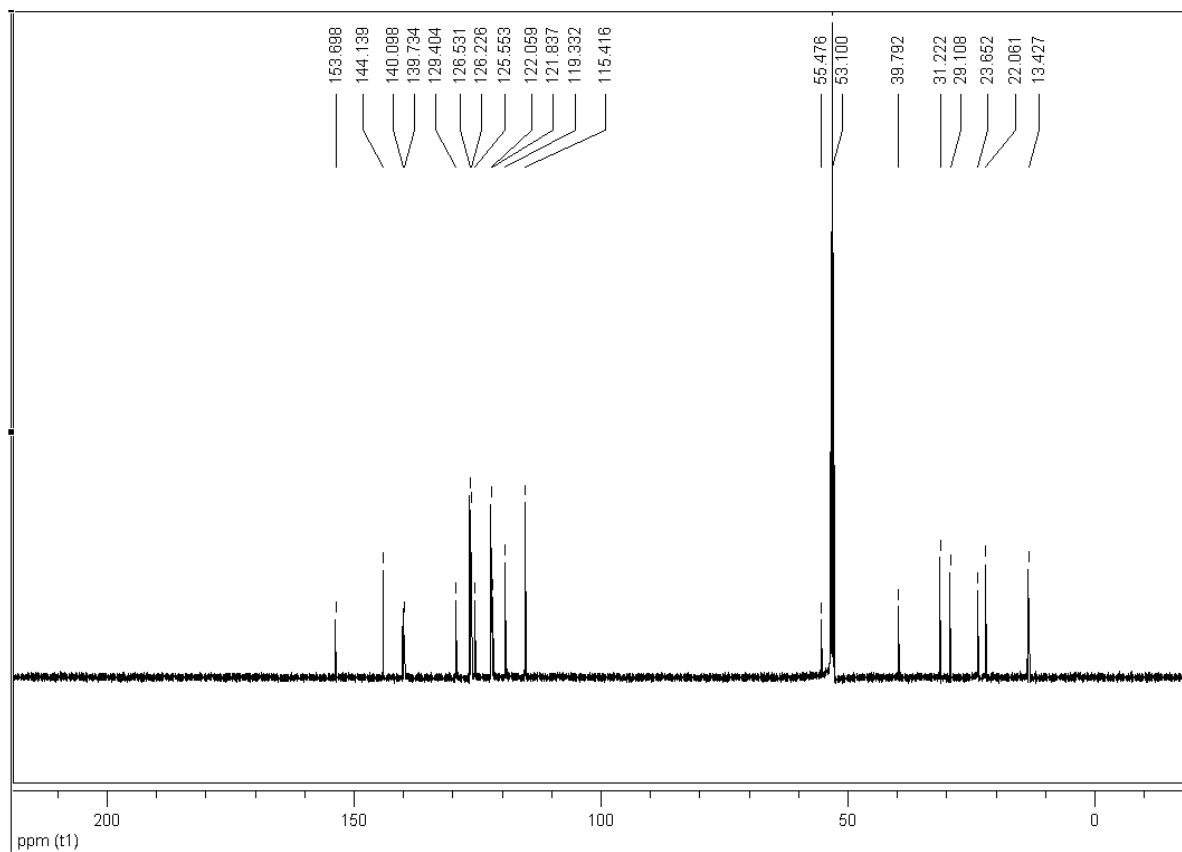

DEPT NMR spectra of **8** recorded in CD<sub>2</sub>Cl<sub>2</sub> (298K, 125 MHz)

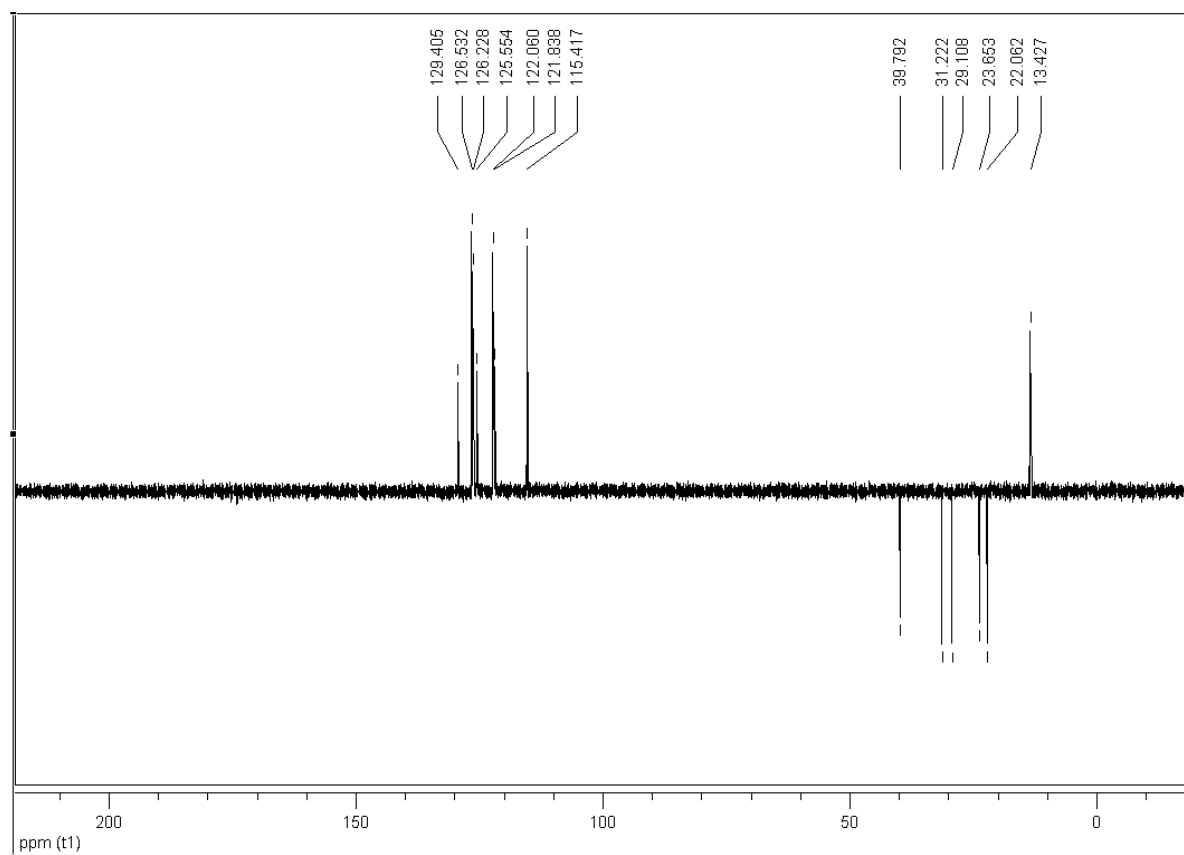

<sup>1</sup>H NMR spectra of **9** recorded in CD<sub>2</sub>Cl<sub>2</sub> (298K, 500 MHz)

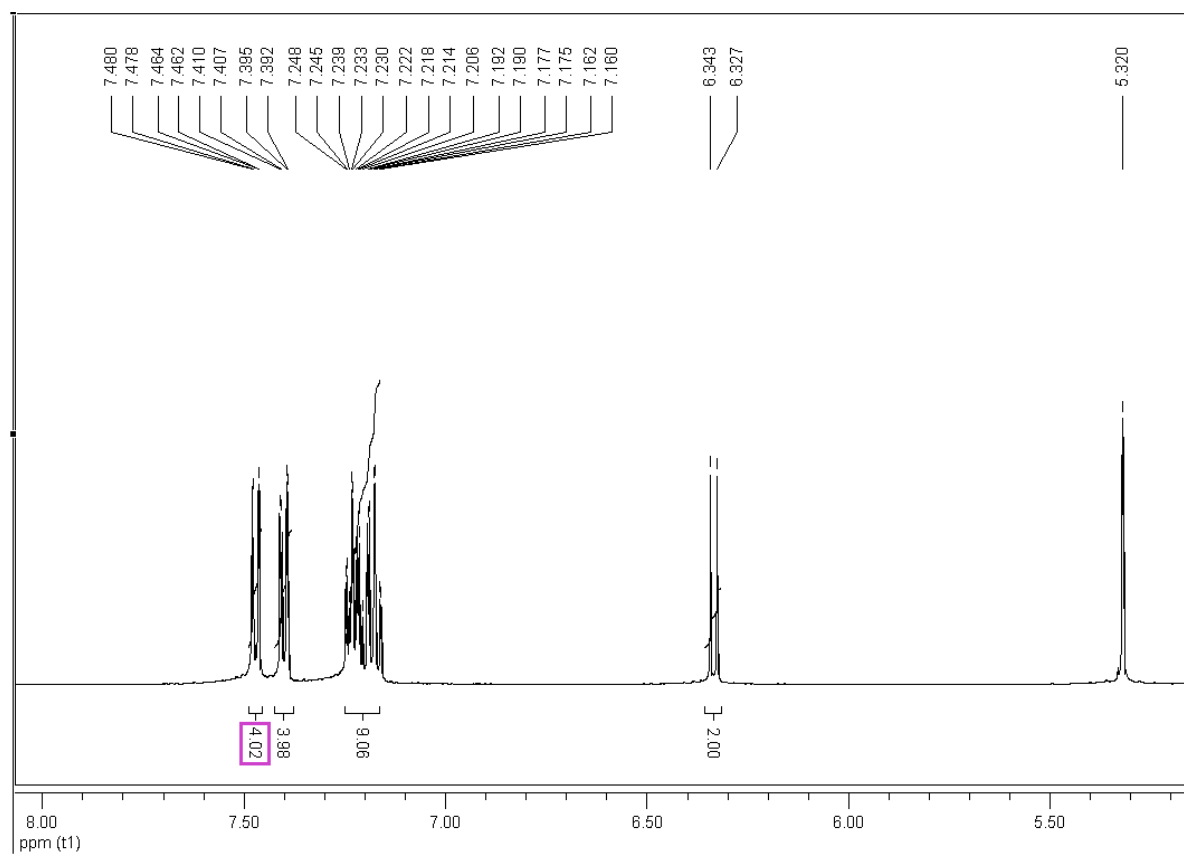

$^{13}\text{C}$  NMR spectra of **9** recorded in  $\text{CD}_2\text{Cl}_2$  (298K, 125 MHz)

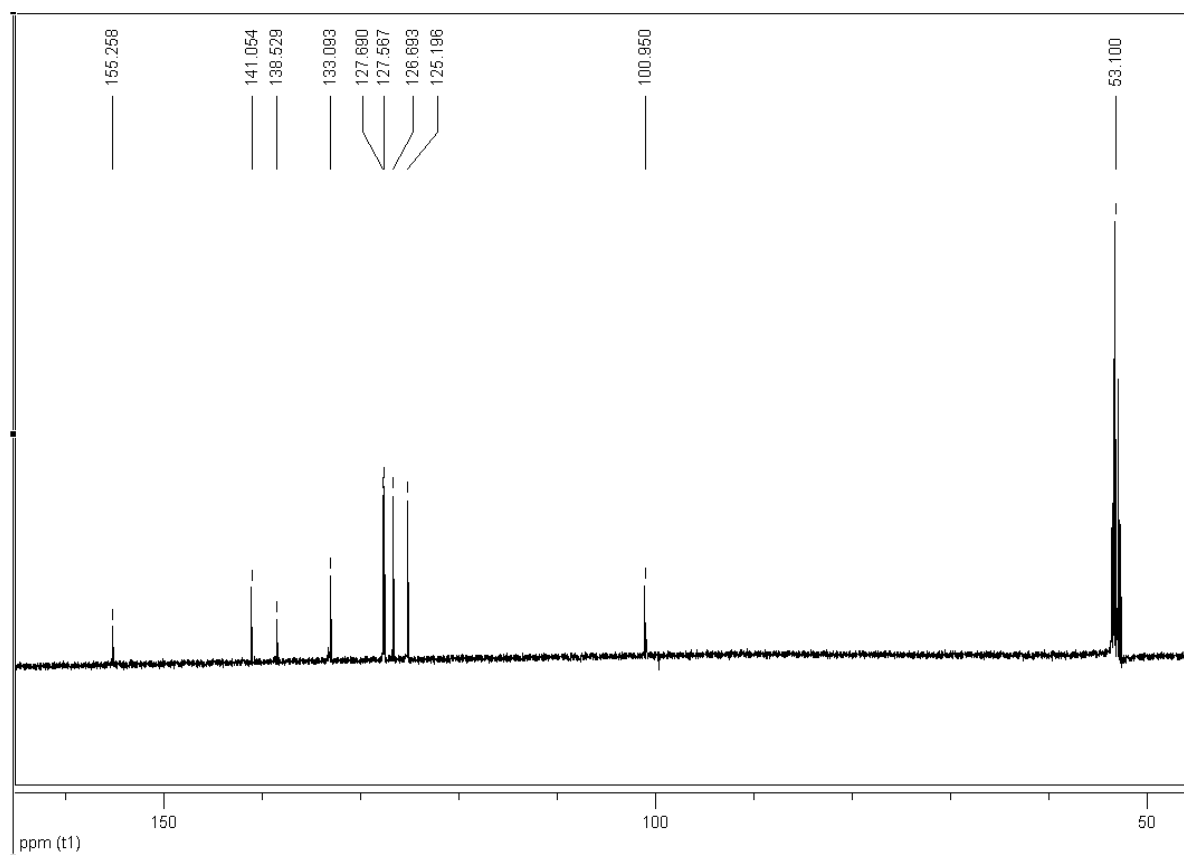

DEPT NMR spectra of **9** recorded in  $\text{CD}_2\text{Cl}_2$  (298K, 125 MHz)

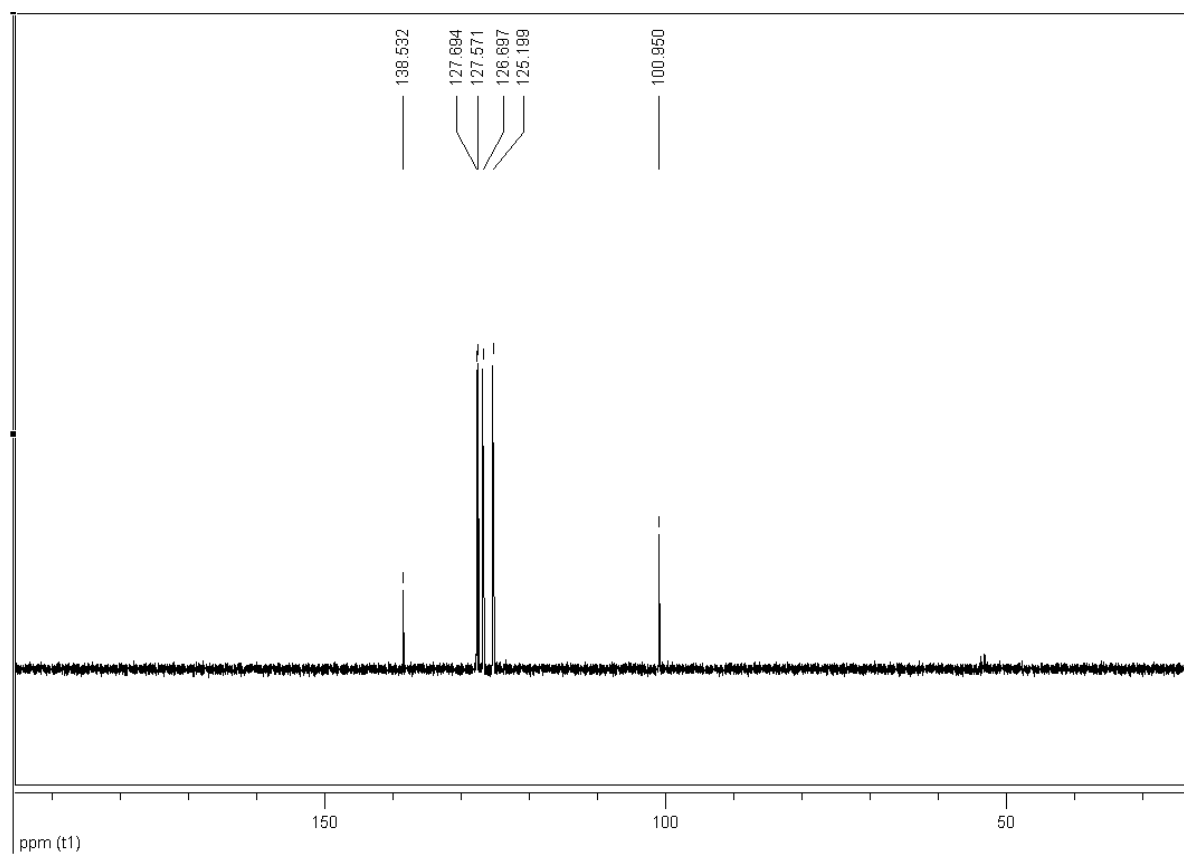

$^1\text{H}$  NMR spectra of **10** recorded in  $\text{CD}_2\text{Cl}_2$  (298K, 500 MHz)

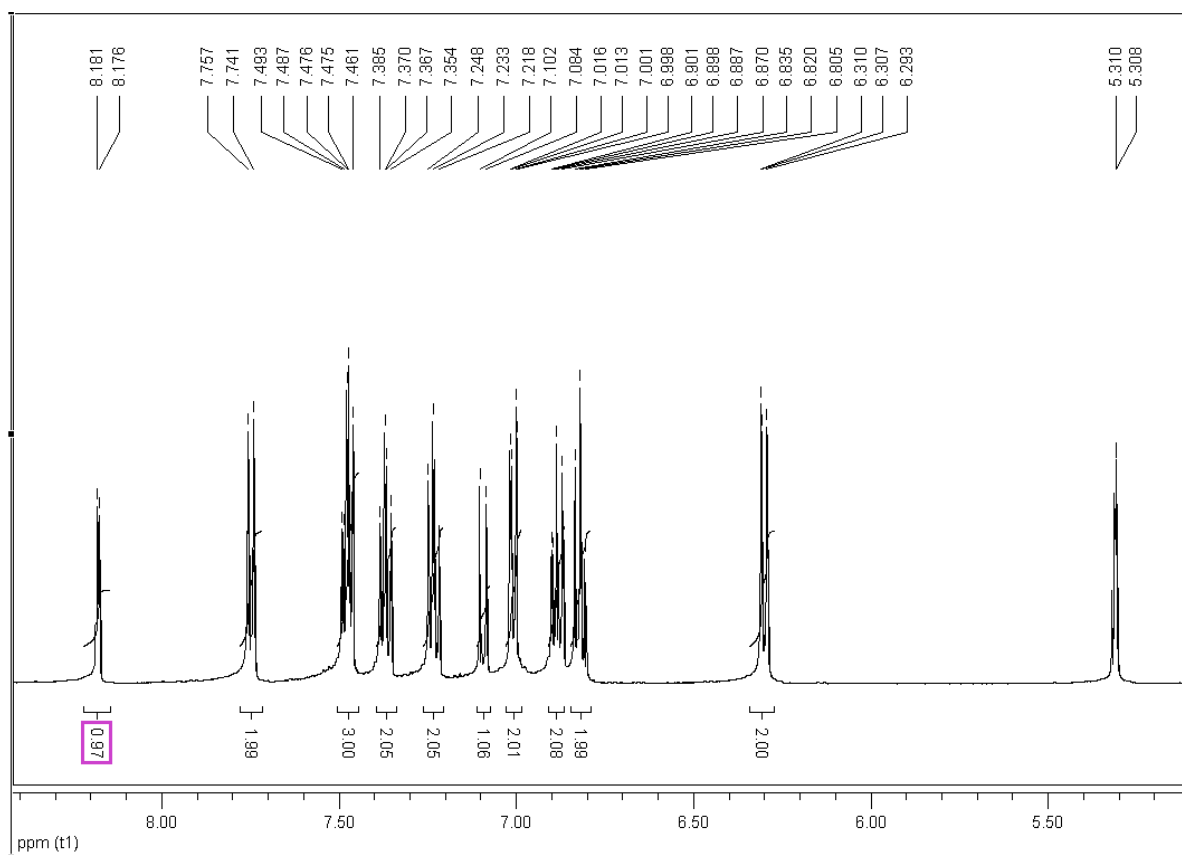

$^{13}\text{C}$  NMR spectra of **10** recorded in  $\text{CD}_2\text{Cl}_2$  (298K, 125 MHz)

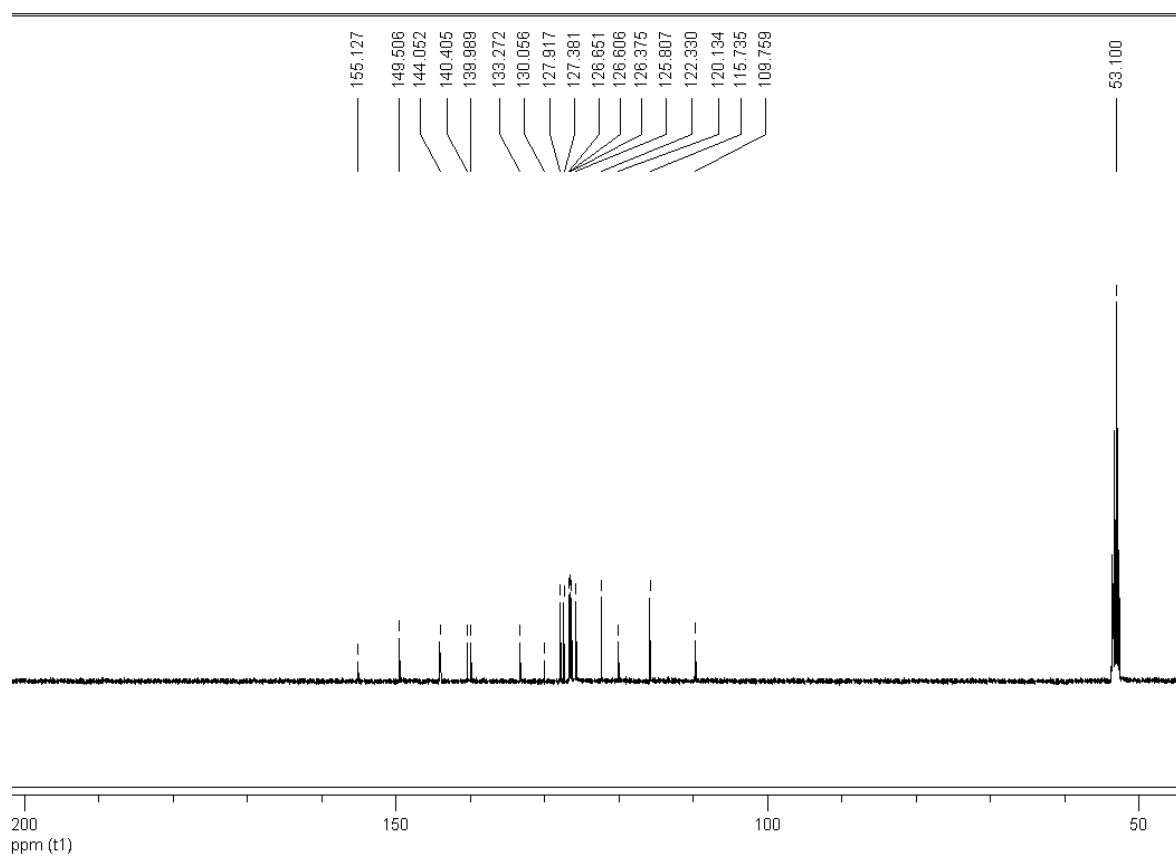



DEPT NMR spectra of **10** recorded in CD<sub>2</sub>Cl<sub>2</sub> (298K, 125 MHz)

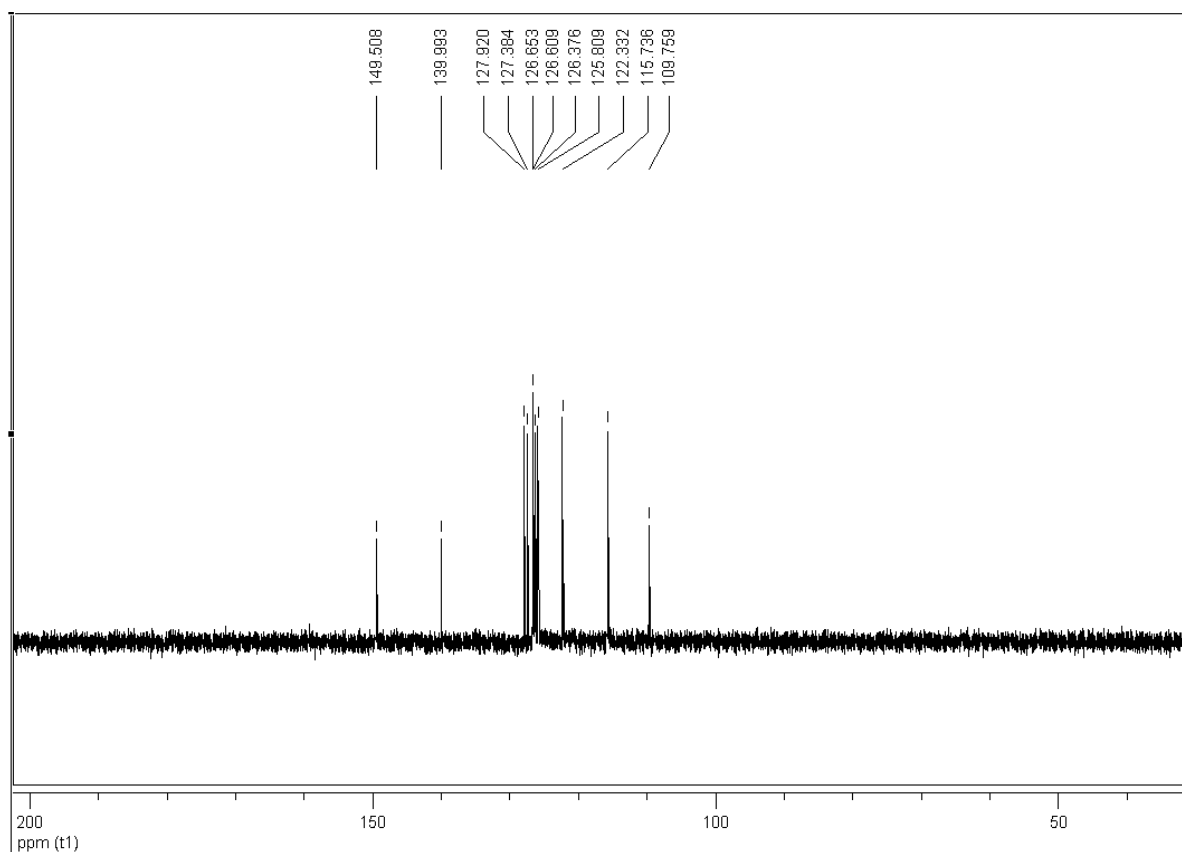

<sup>1</sup>H NMR spectra of **11** recorded in CD<sub>2</sub>Cl<sub>2</sub> (298K, 500 MHz)

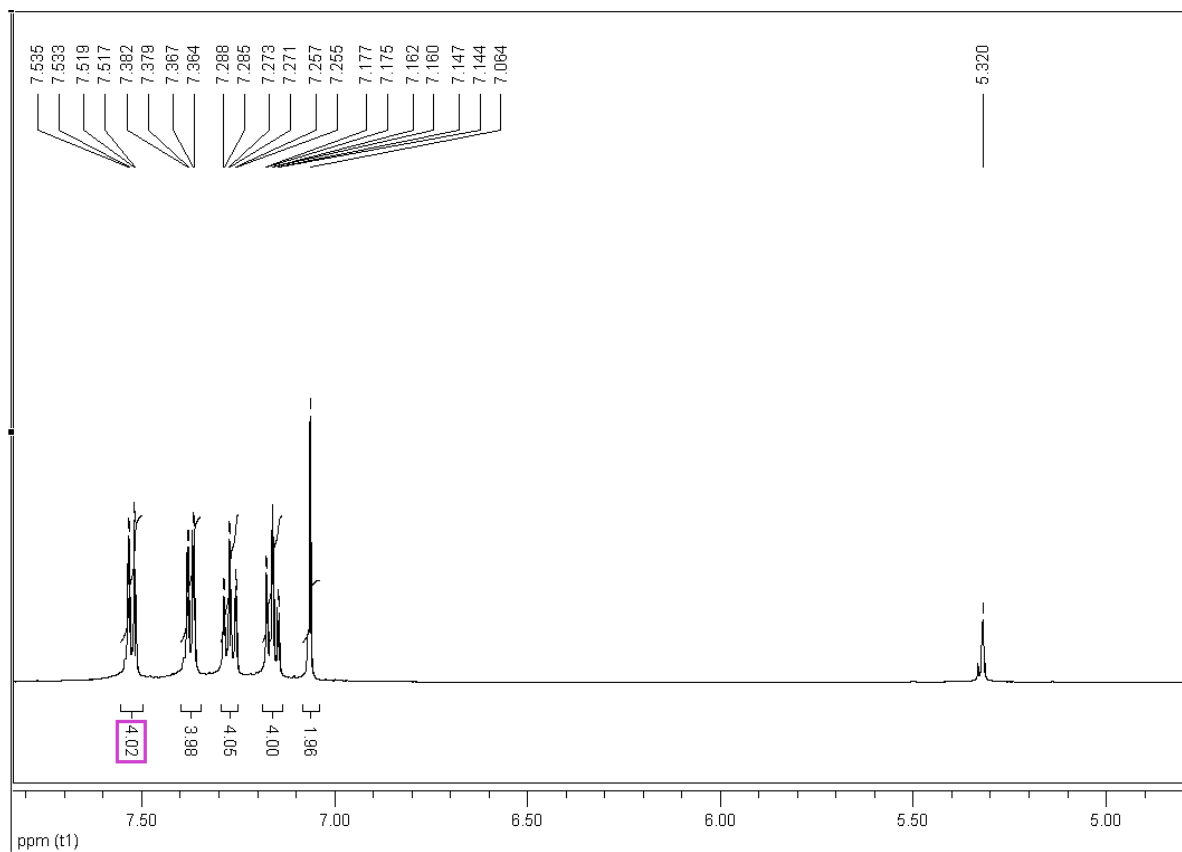

$^{13}\text{C}$  NMR spectra of **11** recorded in  $\text{CD}_2\text{Cl}_2$  (298K, 125 MHz)

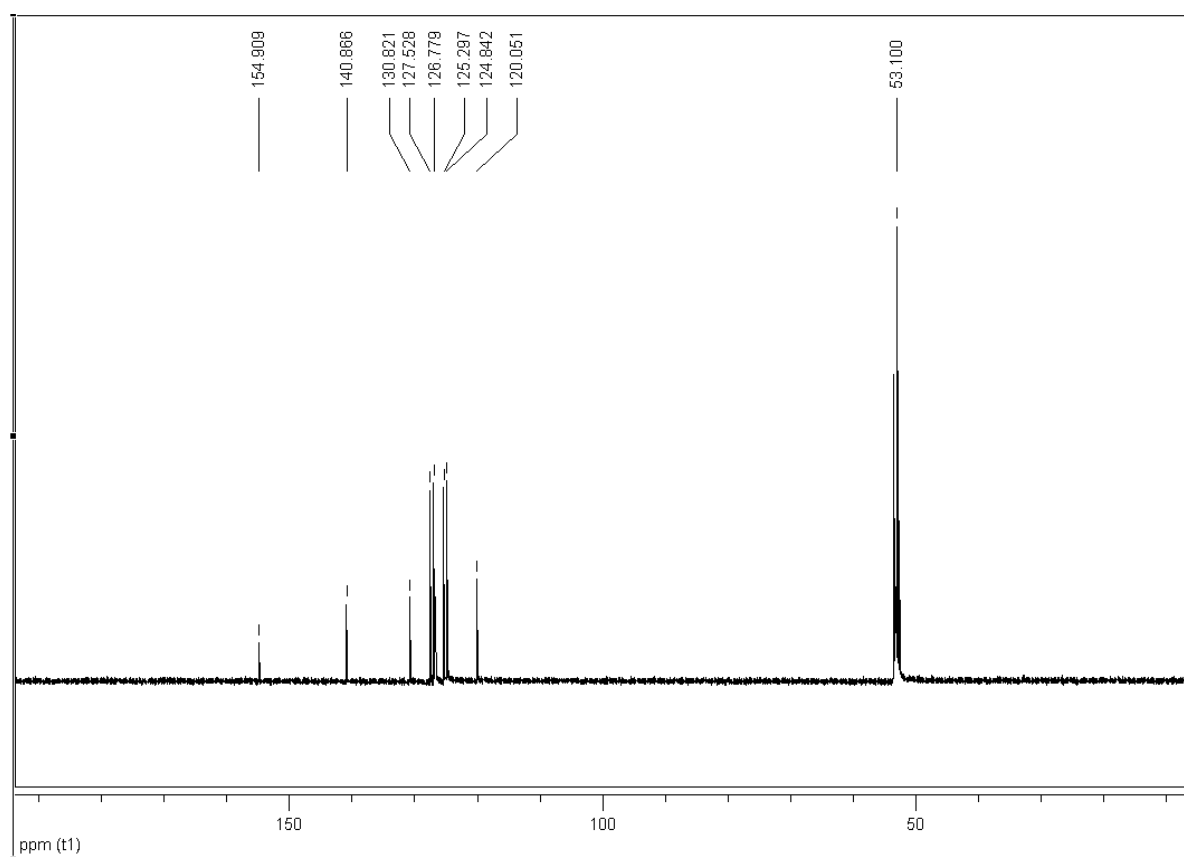

DEPT NMR spectra of **11** recorded in  $\text{CD}_2\text{Cl}_2$  (298K, 125 MHz)

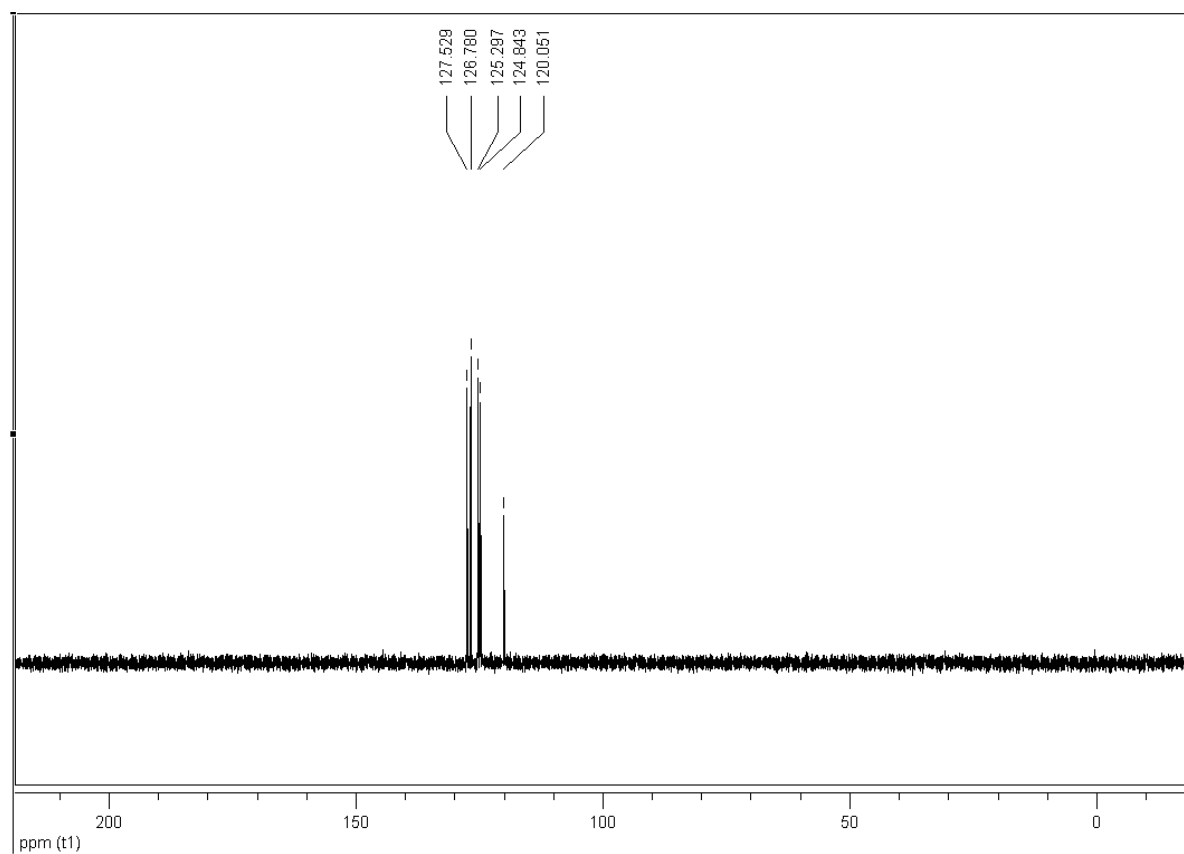

$^1\text{H}$  NMR spectra of **12** recorded in  $\text{CD}_2\text{Cl}_2$  (298K, 500 MHz)

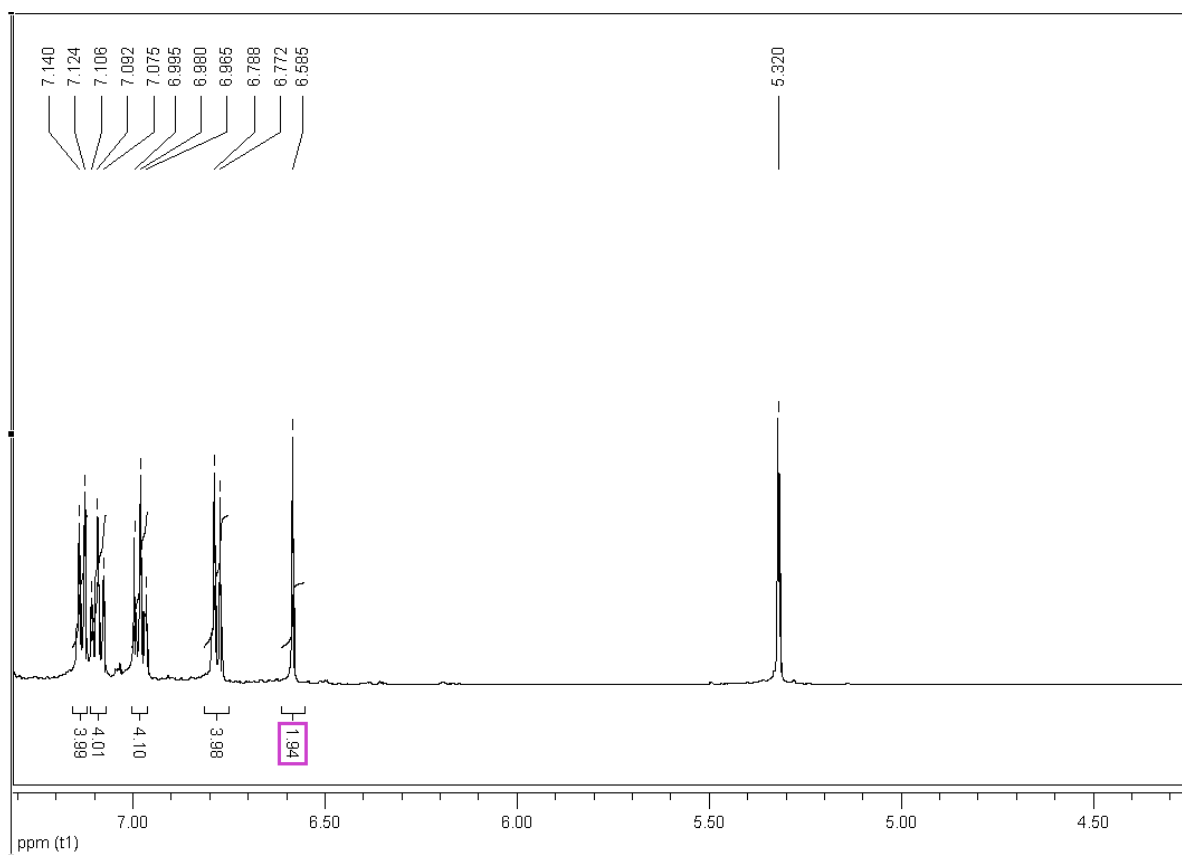

$^{13}\text{C}$  NMR spectra of **12** recorded in  $\text{CD}_2\text{Cl}_2$  (298K, 125 MHz)

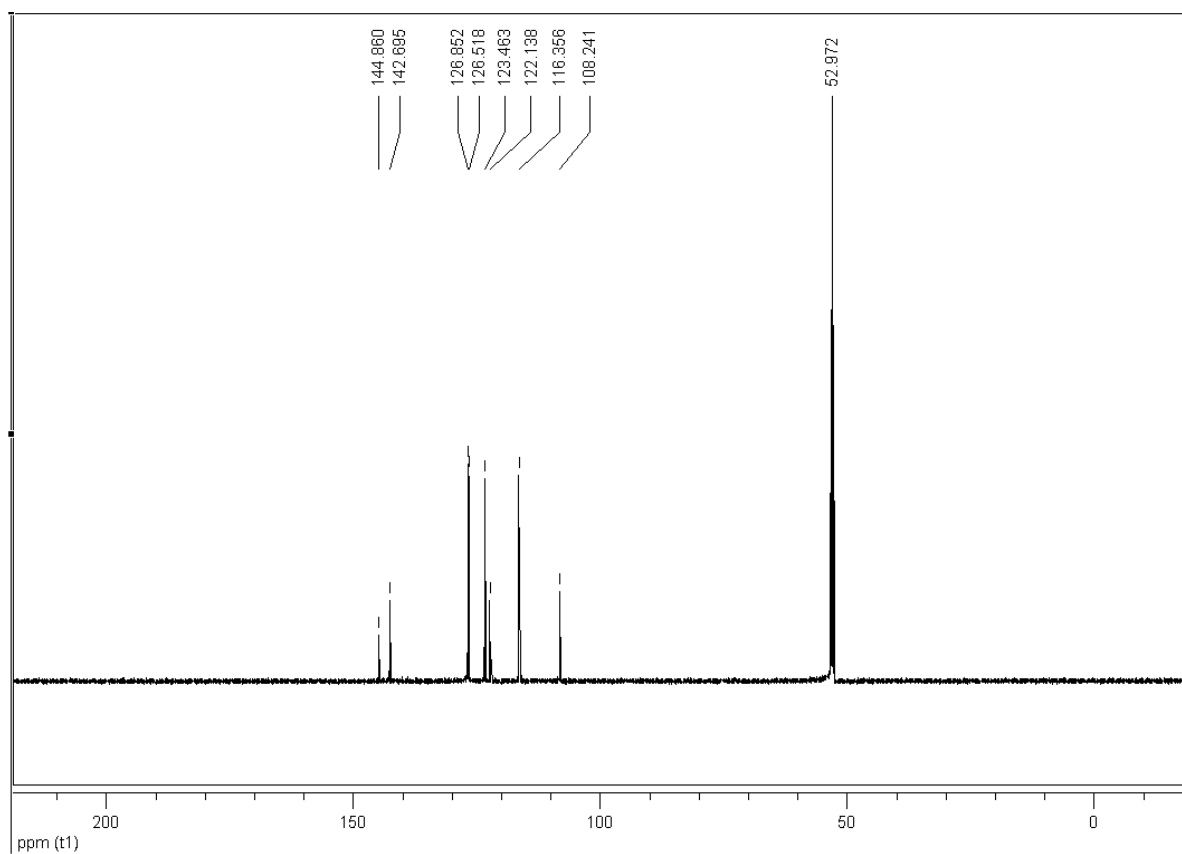

DEPT NMR spectra of **12** recorded in CD<sub>2</sub>Cl<sub>2</sub> (298K, 125 MHz)

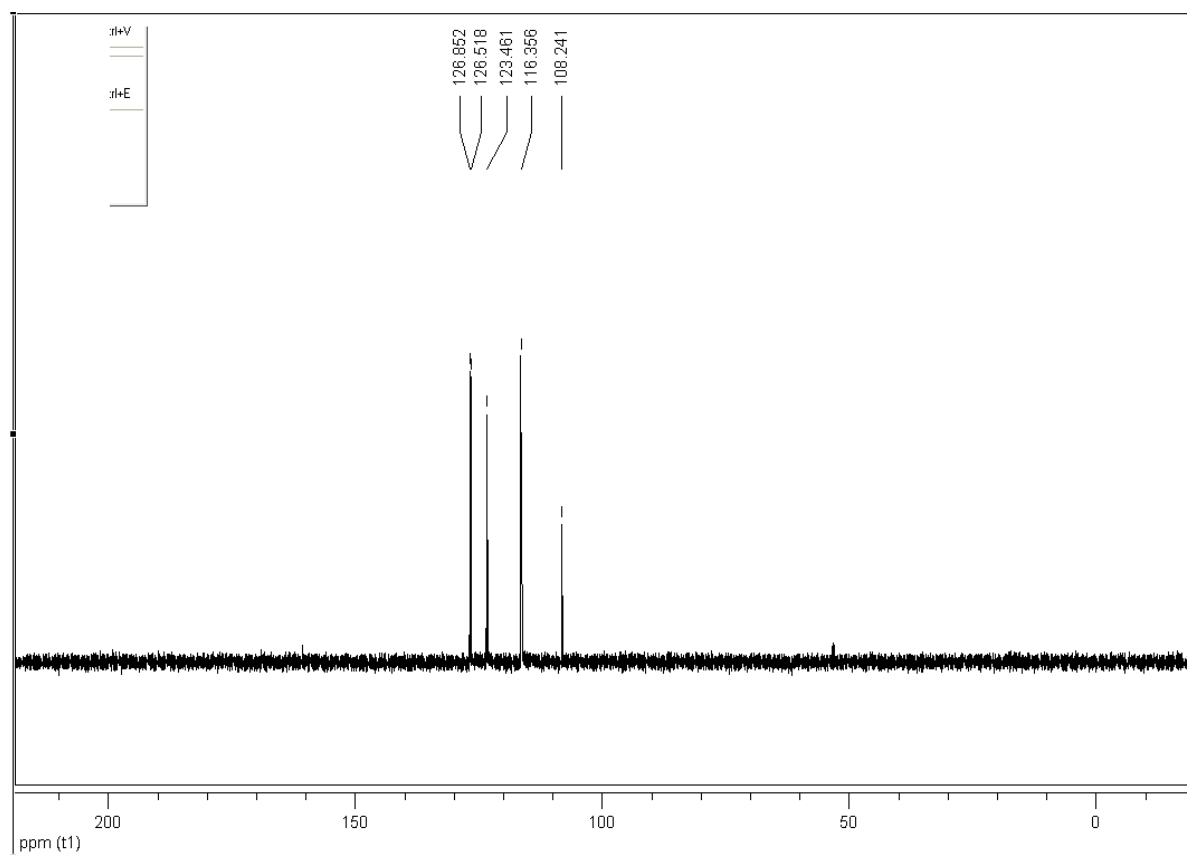

<sup>1</sup>H NMR spectra of **13** recorded in CD<sub>2</sub>Cl<sub>2</sub> (298K, 500 MHz)

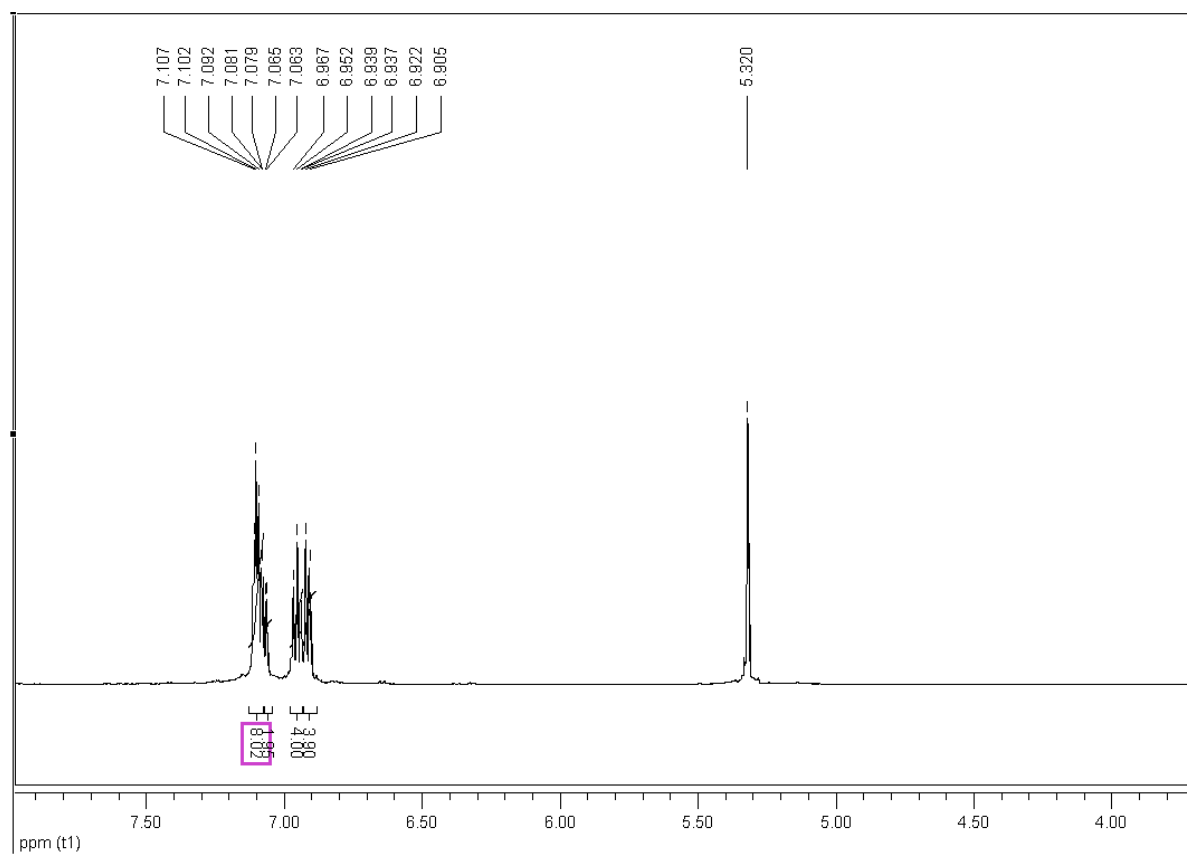

$^{13}\text{C}$  NMR spectra of **13** recorded in  $\text{CD}_2\text{Cl}_2$  (298K, 125 MHz)

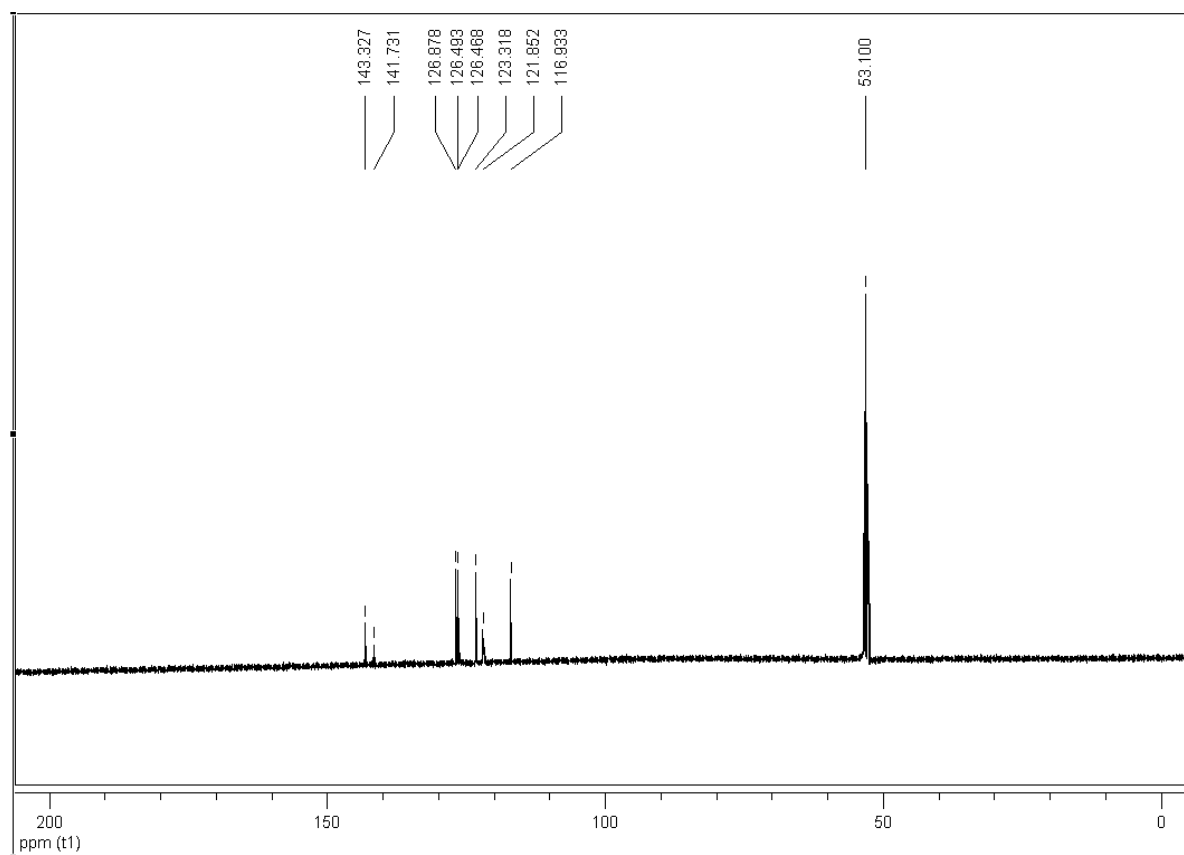

DEPT NMR spectra of **13** recorded in  $\text{CD}_2\text{Cl}_2$  (298K, 125 MHz)

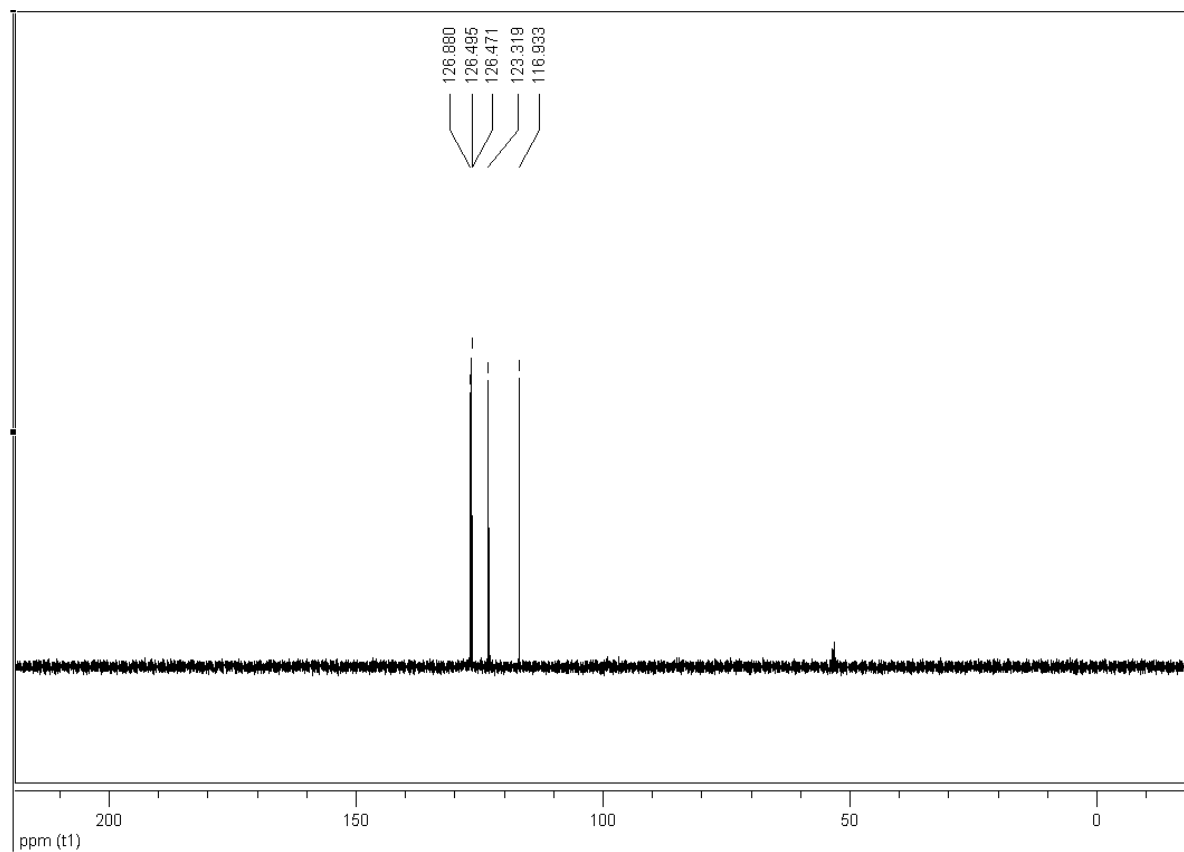

d) Molecular modelling coordinates of **11** and **13**

Molecular modelling coordinates (B3LYP/6-31+G(d,p)) of **11**

| -----  |        |        |                         |           |           |  |
|--------|--------|--------|-------------------------|-----------|-----------|--|
| Center | Atomic | Atomic | Coordinates (Angstroms) |           |           |  |
| Number | Number | Type   | X                       | Y         | Z         |  |
| -----  |        |        |                         |           |           |  |
| 1      | 6      | 0      | 3.231496                | -2.222135 | -1.198757 |  |
| 2      | 6      | 0      | 3.509430                | -1.188972 | -0.292436 |  |
| 3      | 6      | 0      | 4.568311                | -1.340471 | 0.617500  |  |
| 4      | 6      | 0      | 5.320101                | -2.520731 | 0.633397  |  |
| 5      | 6      | 0      | 5.003648                | -3.563556 | -0.238399 |  |
| 6      | 6      | 0      | 3.960901                | -3.410480 | -1.158099 |  |
| 7      | 1      | 0      | 2.436920                | -2.088913 | -1.926328 |  |
| 8      | 1      | 0      | 6.146735                | -2.617256 | 1.330772  |  |
| 9      | 1      | 0      | 5.581713                | -4.482157 | -0.212998 |  |
| 10     | 1      | 0      | 3.726554                | -4.207943 | -1.856660 |  |
| 11     | 6      | 0      | 3.490660                | 1.251034  | -0.259260 |  |
| 12     | 6      | 0      | 3.221076                | 2.332489  | -1.109333 |  |
| 13     | 6      | 0      | 4.552564                | 1.352832  | 0.659449  |  |
| 14     | 6      | 0      | 3.965242                | 3.509700  | -1.001644 |  |
| 15     | 1      | 0      | 2.411661                | 2.253378  | -1.820668 |  |
| 16     | 6      | 0      | 5.314560                | 2.521953  | 0.738558  |  |
| 17     | 1      | 0      | 3.730008                | 4.345730  | -1.653327 |  |
| 18     | 1      | 0      | 6.139864                | 2.574235  | 1.442185  |  |
| 19     | 7      | 0      | 2.756465                | 0.021385  | -0.301849 |  |
| 20     | 16     | 0      | 4.911031                | -0.013130 | 1.755253  |  |
| 21     | 6      | 0      | 1.349382                | -0.042203 | -0.306586 |  |
| 22     | 6      | 0      | 0.684709                | -1.107889 | 0.354611  |  |
| 23     | 1      | 0      | 1.245430                | -1.870345 | 0.882607  |  |
| 24     | 6      | 0      | 5.008457                | 3.610585  | -0.079455 |  |
| 25     | 1      | 0      | 5.592713                | 4.522786  | -0.005364 |  |
| 26     | 6      | 0      | -0.684743               | -1.107900 | 0.354571  |  |
| 27     | 1      | 0      | -1.245482               | -1.870363 | 0.882536  |  |

|    |    |   |           |           |           |
|----|----|---|-----------|-----------|-----------|
| 28 | 6  | 0 | -1.349407 | -0.042234 | -0.306671 |
| 29 | 7  | 0 | 0.670194  | 0.934206  | -0.901229 |
| 30 | 7  | 0 | -0.670212 | 0.934189  | -0.901268 |
| 31 | 7  | 0 | -2.756498 | 0.021326  | -0.302005 |
| 32 | 6  | 0 | -3.490710 | 1.250960  | -0.259531 |
| 33 | 6  | 0 | -3.509445 | -1.189047 | -0.292334 |
| 34 | 6  | 0 | -4.568216 | -1.340422 | 0.617749  |
| 35 | 6  | 0 | -3.231633 | -2.222322 | -1.198570 |
| 36 | 1  | 0 | -2.437145 | -2.089183 | -1.926252 |
| 37 | 6  | 0 | -3.961034 | -3.410656 | -1.157663 |
| 38 | 1  | 0 | -3.726785 | -4.208214 | -1.856147 |
| 39 | 6  | 0 | -5.003665 | -3.563613 | -0.237807 |
| 40 | 1  | 0 | -5.581729 | -4.482210 | -0.212225 |
| 41 | 6  | 0 | -3.221277 | 2.332277  | -1.109825 |
| 42 | 1  | 0 | -2.412043 | 2.253076  | -1.821360 |
| 43 | 6  | 0 | -3.965418 | 3.509507  | -1.002183 |
| 44 | 1  | 0 | -3.730292 | 4.345439  | -1.654031 |
| 45 | 6  | 0 | -4.552474 | 1.352890  | 0.659318  |
| 46 | 16 | 0 | -4.910797 | -0.012918 | 1.755352  |
| 47 | 6  | 0 | -5.320010 | -2.520680 | 0.633896  |
| 48 | 1  | 0 | -6.146560 | -2.617110 | 1.331383  |
| 49 | 6  | 0 | -5.008477 | 3.610541  | -0.079828 |
| 50 | 1  | 0 | -5.592707 | 4.522763  | -0.005774 |
| 51 | 6  | 0 | -5.314460 | 2.522027  | 0.738382  |
| 52 | 1  | 0 | -6.139655 | 2.574404  | 1.442130  |

-----  
Energy (HF) = - 2093.2382134 Hartrees

Molecular modelling coordinates (B3LYP/6-31+G(d,p)) of **13**

| -----  |        |        |                         |           |           |  |
|--------|--------|--------|-------------------------|-----------|-----------|--|
| Center | Atomic | Atomic | Coordinates (Angstroms) |           |           |  |
| Number | Number | Type   | X                       | Y         | Z         |  |
| -----  |        |        |                         |           |           |  |
| 1      | 6      | 0      | -2.892591               | -2.366803 | 0.923209  |  |
| 2      | 6      | 0      | -3.310071               | -1.240221 | 0.199425  |  |
| 3      | 6      | 0      | -4.443967               | -1.354301 | -0.626224 |  |
| 4      | 6      | 0      | -5.153455               | -2.556872 | -0.692416 |  |
| 5      | 6      | 0      | -4.718996               | -3.676881 | 0.018492  |  |
| 6      | 6      | 0      | -3.581552               | -3.576835 | 0.820366  |  |
| 7      | 1      | 0      | -2.016588               | -2.299601 | 1.556728  |  |
| 8      | 1      | 0      | -6.037143               | -2.613654 | -1.321122 |  |
| 9      | 1      | 0      | -5.264845               | -4.612167 | -0.054946 |  |
| 10     | 1      | 0      | -3.228003               | -4.437268 | 1.380444  |  |
| 11     | 6      | 0      | -3.310068               | 1.240023  | 0.199705  |  |
| 12     | 6      | 0      | -2.892600               | 2.366431  | 0.923765  |  |
| 13     | 6      | 0      | -4.443960               | 1.354300  | -0.625924 |  |
| 14     | 6      | 0      | -3.581557               | 3.576490  | 0.821197  |  |
| 15     | 1      | 0      | -2.016611               | 2.299075  | 1.557287  |  |
| 16     | 6      | 0      | -5.153441               | 2.556887  | -0.691846 |  |
| 17     | 1      | 0      | -3.228015               | 4.436786  | 1.381492  |  |
| 18     | 1      | 0      | -6.037123               | 2.613819  | -1.320547 |  |
| 19     | 7      | 0      | -2.610208               | -0.000107 | 0.284612  |  |
| 20     | 16     | 0      | -4.921056               | 0.000116  | -1.679574 |  |
| 21     | 6      | 0      | -4.718987               | 3.676730  | 0.019329  |  |
| 22     | 1      | 0      | -5.264832               | 4.612034  | -0.053898 |  |
| 23     | 6      | 0      | -1.254267               | -0.000146 | 0.671234  |  |
| 24     | 6      | 0      | -0.712850               | -0.000267 | 1.933793  |  |
| 25     | 16     | 0      | 0.000073                | -0.000024 | -0.555262 |  |
| 26     | 6      | 0      | 0.712777                | -0.000231 | 1.933855  |  |
| 27     | 1      | 0      | -1.320944               | -0.000350 | 2.831742  |  |
| 28     | 6      | 0      | 1.254307                | -0.000106 | 0.671354  |  |



|    |    |   |          |           |           |
|----|----|---|----------|-----------|-----------|
| 29 | 1  | 0 | 1.320751 | -0.000274 | 2.831890  |
| 30 | 7  | 0 | 2.610270 | -0.000016 | 0.284807  |
| 31 | 6  | 0 | 3.309971 | 1.240168  | 0.199576  |
| 32 | 6  | 0 | 3.310254 | -1.240061 | 0.199788  |
| 33 | 6  | 0 | 2.892507 | 2.366644  | 0.923538  |
| 34 | 6  | 0 | 4.443703 | 1.354432  | -0.626261 |
| 35 | 6  | 0 | 2.893047 | -2.366532 | 0.923911  |
| 36 | 6  | 0 | 4.444020 | -1.354190 | -0.626025 |
| 37 | 6  | 0 | 3.581272 | 3.576774  | 0.820623  |
| 38 | 1  | 0 | 2.016653 | 2.299256  | 1.557249  |
| 39 | 6  | 0 | 5.153004 | 2.557113  | -0.692550 |
| 40 | 16 | 0 | 4.920895 | 0.000086  | -1.679659 |
| 41 | 6  | 0 | 3.582098 | -3.576515 | 0.821186  |
| 42 | 1  | 0 | 2.017167 | -2.299266 | 1.557594  |
| 43 | 6  | 0 | 5.153606 | -2.556713 | -0.692119 |
| 44 | 6  | 0 | 4.718527 | 3.677024  | 0.018495  |
| 45 | 1  | 0 | 3.227736 | 4.437121  | 1.380843  |
| 46 | 1  | 0 | 6.036566 | 2.614050  | -1.321420 |
| 47 | 1  | 0 | 3.228757 | -4.436862 | 1.381529  |
| 48 | 6  | 0 | 4.719390 | -3.676618 | 0.019092  |
| 49 | 1  | 0 | 6.037186 | -2.613539 | -1.320974 |
| 50 | 1  | 0 | 5.264219 | 4.612395  | -0.055027 |
| 51 | 1  | 0 | 5.265305 | -4.611870 | -0.054279 |

-----  
Energy (HF) = - 2381.937506 Hartree

e) UV/Vis-NIR spectra of **9** and **9-H<sup>+</sup>**

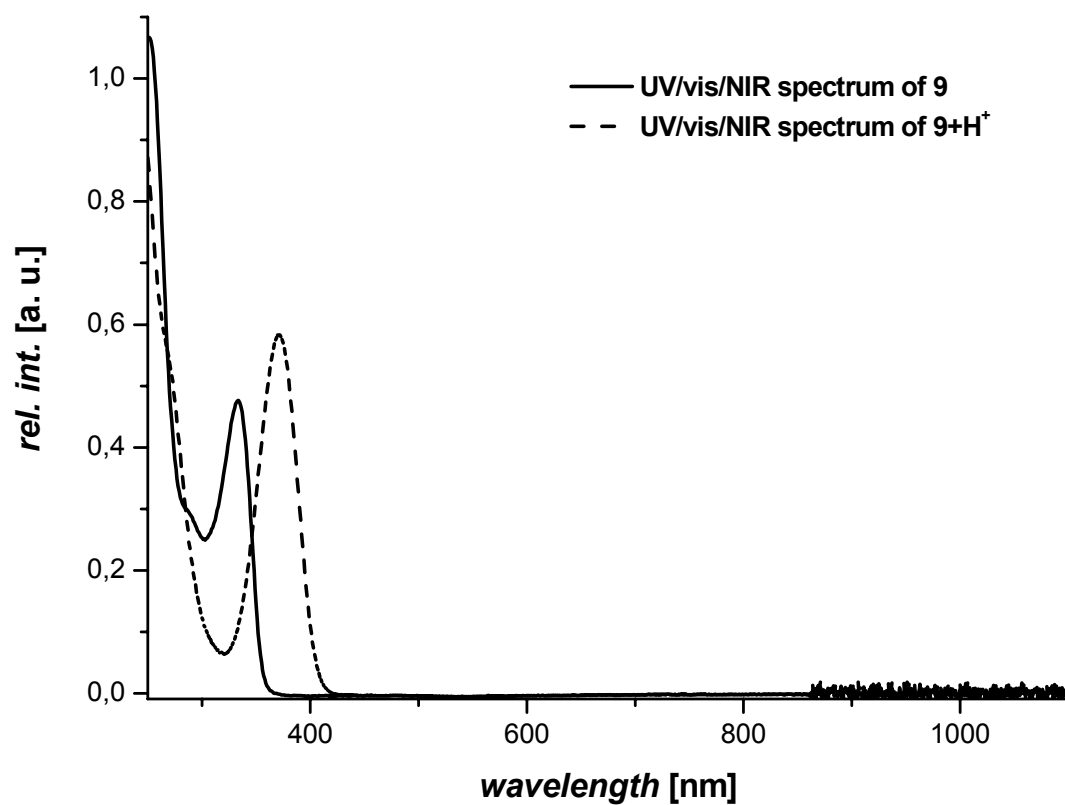

Supplement: b814850c.pdf [file b814850c.pdf]
